# Supplementary material for: Microbial phenotypic heterogeneity in response to a metabolic toxin: Continuous, dynamically shifting distribution of formaldehyde tolerance in Methylobacterium extorquens populations
Source: PubMed Central journal article supplement (PMC6858071; doi:10.1371/journal.pgen.1008458), 2019-11-11
Supplement: pgen.1008458.s013.pdf [file pgen.1008458.s013.pdf]

**Table S1. Tolerant subpopulation shows no significant difference in sensitivity to antibiotics or hydrogen peroxide.** *M. extorquens* populations selected for tolerance via a 4 mM formaldehyde exposure experiment ("tolerant") and non-selected populations ("WT") were tested for sensitivity to H<sub>2</sub>O<sub>2</sub> and antibiotics using a disk susceptibility test. Stressors were provided in the amount listed; test disks were purchased from Fisher Technical Company (Erythromycin, Kanamycin) or BD BBL Sensi-Disc (all others). Data shown here are from two experiments: an initial screening experiment conducted with no replicates, and a second experiment in triplicate.

| First experiment, no replicates.                     |            |           |               |
|------------------------------------------------------|------------|-----------|---------------|
| Stress                                               | Population | Replicate | Diameter (cm) |
| blank disk                                           | WT         | A         | 0             |
|                                                      | tolerant   | A         | 0             |
| Rifampicin, 5 mg                                     | WT         | A         | 35            |
|                                                      | tolerant   | A         | 36            |
| Vancomycin, 30 mg                                    | WT         | A         | 0             |
|                                                      | tolerant   | A         | 0             |
| Cefoxitin, 30 mg                                     | WT         | A         | 0             |
|                                                      | tolerant   | A         | 0             |
| Novobiocin, 5 mg                                     | WT         | A         | 20            |
|                                                      | tolerant   | A         | 23            |
| Nalidixic Acid, 30 mg                                | WT         | A         | 0             |
|                                                      | tolerant   | A         | 0             |
| Erythromycin, 15 mg                                  | WT         | A         | 0             |
|                                                      | tolerant   | A         | 0             |
| Colistin, 10 mg                                      | WT         | A         | 0             |
|                                                      | tolerant   | A         | 0             |
| Kanamycin, 30 mg                                     | WT         | A         | 30            |
|                                                      | tolerant   | A         | 32            |
| Gentamicin, 10 mg                                    | WT         | A         | 17            |
|                                                      | tolerant   | A         | 13            |
| H <sub>2</sub> O <sub>2</sub> , 5 µL of 30% solution | WT         | A         | 43            |
|                                                      | tolerant   | A         | 60            |
| Ciprofloxacin, 10 mg                                 | WT         | A         | 0             |
|                                                      | tolerant   | A         | 8             |
| Second experiment, triplicates.                      |            |           |               |
| Stress                                               | Population | Replicate | Diameter (cm) |
| H <sub>2</sub> O <sub>2</sub> , 3 µL of 30% solution | WT         | A         | 53            |
|                                                      |            | B         | 55            |
|                                                      |            | C         | 55            |
|                                                      | tolerant   | A         | 60            |
|                                                      |            | B         | 60            |
|                                                      |            | C         | 55            |
| Gentamicin, 10 mg                                    | WT         | A         | 20            |
|                                                      |            | B         | 17            |
|                                                      |            | C         | 18            |
|                                                      | tolerant   | A         | 20            |
|                                                      |            | B         | 18            |
|                                                      |            | C         | 18            |
| Kanamycin, 30 mg                                     | WT         | A         | 26            |
|                                                      |            | B         | 25            |
|                                                      |            | C         | 27            |
|                                                      | tolerant   | A         | 30            |
|                                                      |            | B         | 28            |
|                                                      |            | C         | 28            |
| Ciprofloxacin, 10 mg                                 | WT         | A         | 16            |
|                                                      |            | B         | 15            |
|                                                      |            | C         | 17            |
|                                                      | tolerant   | A         | 16            |
|                                                      |            | B         | 16            |
|                                                      |            | C         | 16            |
