# Supplementary material for: Microbial phenotypic heterogeneity in response to a metabolic toxin: Continuous, dynamically shifting distribution of formaldehyde tolerance in Methylobacterium extorquens populations
Source: PLOS journal article supplement (doi:10.1371/journal.pgen.1008458), 2019-11-11
Supplement: S6 (10.1371/journal.pgen.1008458.s006) [file journal.pgen.1008458.s006]

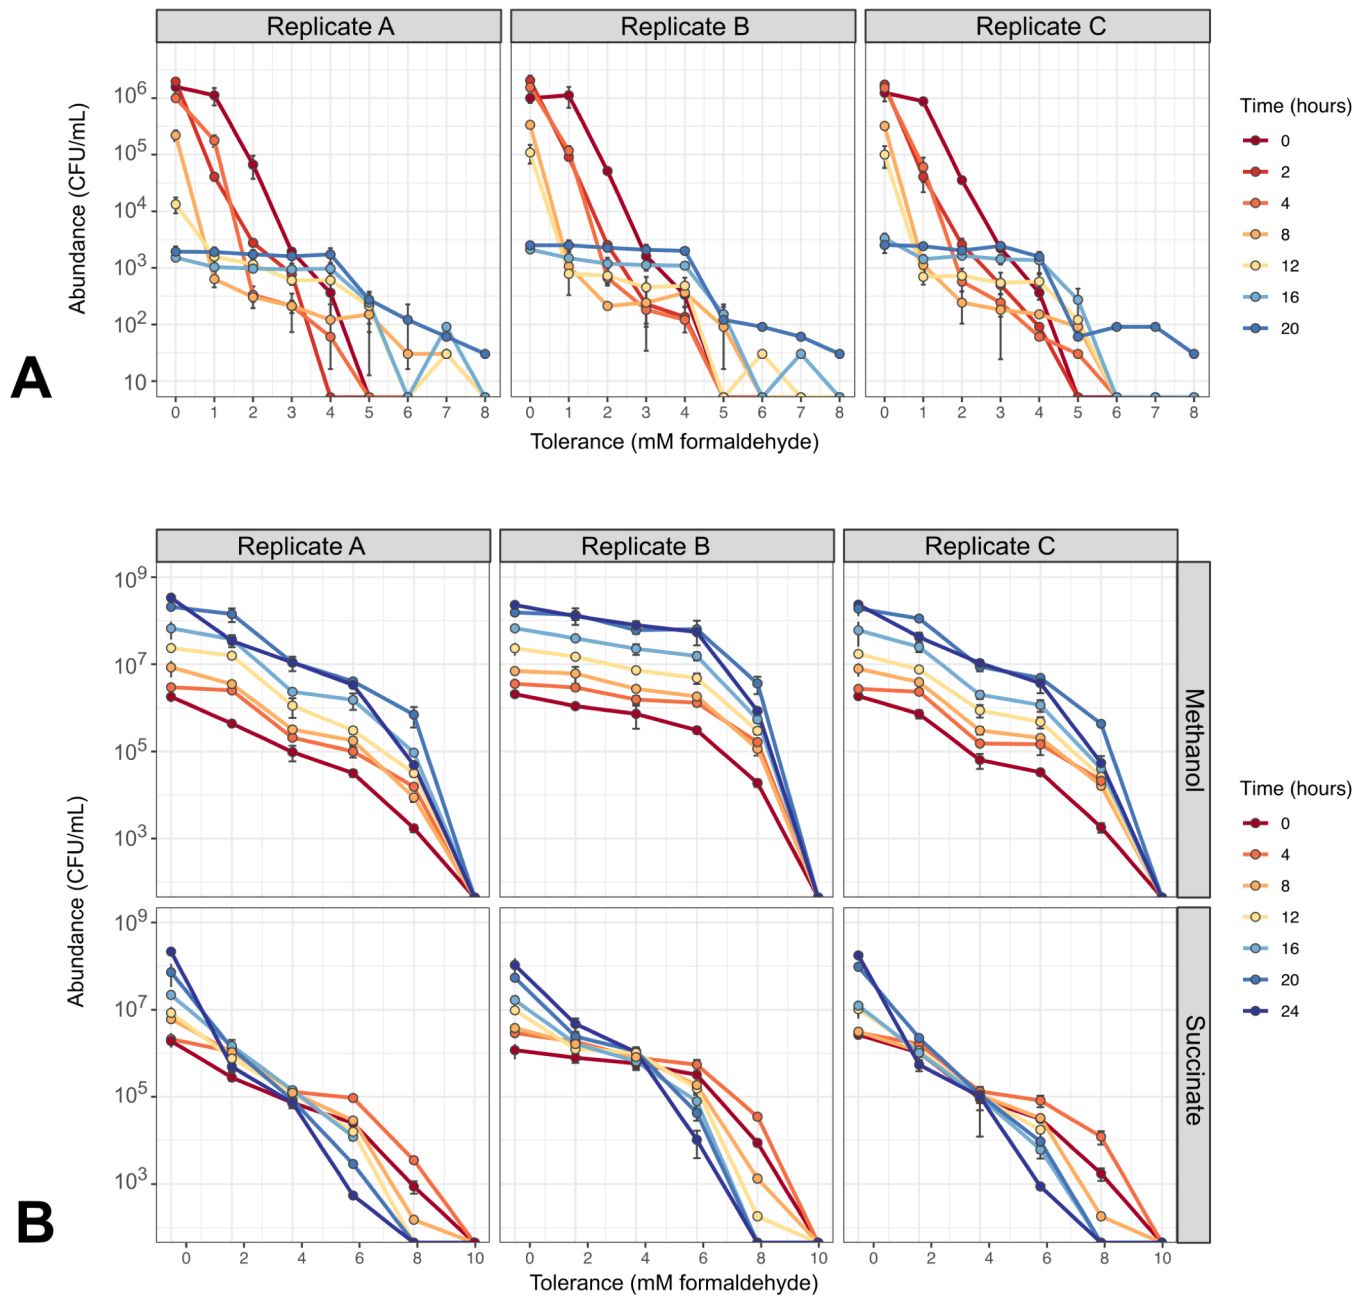

**Figure S6. The distribution of formaldehyde tolerance within an *M. extorquens* population changes over time depending on growth conditions.**

A) exposure to 4 mM formaldehyde selecting for tolerant cells; and B) regrowth of a tolerant population on formaldehyde-free medium (top row: methanol as the growth substrate; bottom row: succinate). Each column represents a separate biological replicate; error bars denote the standard deviation of three replicate platings for colony counts. Replicate B alone is shown in Fig. 7.
